# Supplementary material for: In silico identification of a core regulatory network of OCT4 in human embryonic stem cells using an integrated approach
Source: PubMed Central journal article supplement (PMC2714862; doi:10.1186/1471-2164-10-314), 2009-07-15
Supplement: 1471-2164-10-314-S8.pdf [file 1471-2164-10-314-S8.pdf]

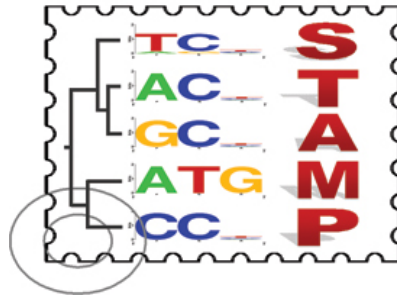

Jump to: [Multiple Alignment](#) [Motif Tree](#) [Motif Matching](#)

Input file: 12 motifs loaded

Settings: Metric=PCC, Alignment=SWU, Gap-open=1000, Gap-extend=1000, -nooverlapalign

Multiple Alignment=IR, Tree=UPGMA, Matching against: TRANSFAC

Note: All results files are removed nightly at midnight EST. Please save your results by saving "Webpage, complete".

[Download results as a PDF](#)

[Click here to run STAMP again.](#)

## Multiple Alignment

(Consensus sequence representations shown, but multiple alignment was carried out on the matrices)

```

Motif_1: -----TCAGAATTCAGTA-----
Motif_2: -----TTGANATGCAAA-----
Motif_3: -----GGAAAAGCGCCCAATTAGTGCCTCCCC
Motif_4: -----TCCNGATCCACACGCTACAAGGCA-----
Motif_5: -----CAATMCMNAGNACCAG-----
Motif_6: -----ACCN YCCKNNKKTNSCAAGCYGCGG-----
Motif_7: GCGAACCTCCGGAAGTGACAGTAACAGAGA-----
Motif_8: -----CAATAAYATGGATSTACACARCACATG-----
Motif_9: -----CAACAAAGANCGCGCCNCNNTTTTC-----
Motif_10: -----AAWTGCAAAT-----
Motif_11: -----CCWCCNCCANCYCC-----
Motif_12: -----CACAYACRCANACACAMN-----

```

**Familial Profile:**  
([click for matrix](#))

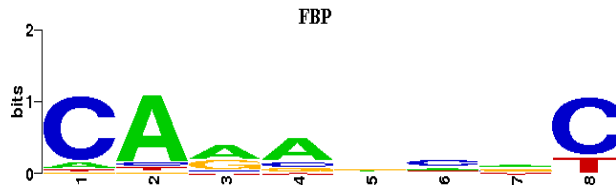

**Motif Tree**

Tree (drawn by [PhyIip](#))

[Click here for Newick-format tree](#) (viewable with [MEGA](#))

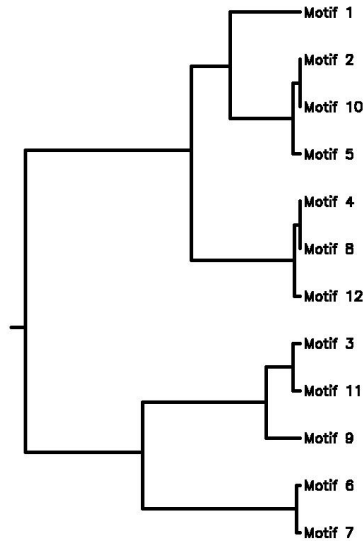

| Input Motif                                                                                                 | Best match in TRANSFAC                                                                                                                      |
|-------------------------------------------------------------------------------------------------------------|---------------------------------------------------------------------------------------------------------------------------------------------|
| 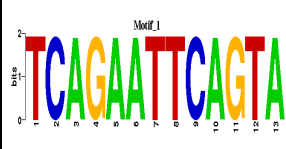 <p><b>Motif 1</b></p>    |  <p><b>LAC9_M00207</b><br/>(E val: 8.9124e-06)</p>       |
|  <p><b>Motif 2</b></p>    |  <p><b>Oct-4_M01125</b><br/>(E val: 4.4520e-14)</p>      |
|  <p><b>Motif 10</b></p>   |  <p><b>Oct-1_M00930</b><br/>(E val: 1.0206e-11)</p>      |
|  <p><b>Motif 5</b></p>   |  <p><b>Pitx2_M00482</b><br/>(E val: 7.7511e-05)</p>     |
|  <p><b>Motif 4</b></p>  |  <p><b>ARR10_M01050</b><br/>(E val: 4.4376e-05)</p>    |
|  <p><b>Motif 8</b></p>  |  <p><b>Opaque-2_M00374</b><br/>(E val: 3.9476e-06)</p> |
|  <p><b>Motif 12</b></p> |  <p><b>RAP1_M00213</b><br/>(E val: 5.1544e-07)</p>     |
|  <p><b>Motif 3</b></p>  |  <p><b>En_M00696</b></p>                               |

|                                                                                                    |                                                                                                                                  |
|----------------------------------------------------------------------------------------------------|----------------------------------------------------------------------------------------------------------------------------------|
|                                                                                                    | (E val: 2.3193e-06)                                                                                                              |
| 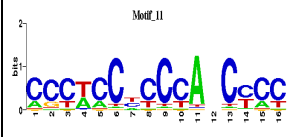 <p>Motif_11</p> |  <p>ZNF219_M01122<br/>(E val: 5.1682e-07)</p> |
|  <p>Motif_9</p>  |  <p>STE11_M01005<br/>(E val: 1.2779e-05)</p>  |
|  <p>Motif_6</p>  |  <p>PEA3_M00655<br/>(E val: 1.3863e-05)</p>   |
|  <p>Motif_7</p>  |  <p>BLIMP1_M01066<br/>(E val: 8.8016e-09)</p> |

### Motif Similarity Matches

#### Motif\_1

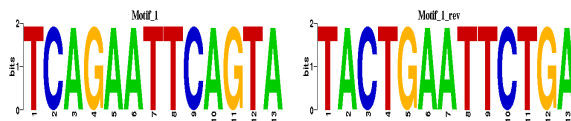

*forward*

*reverse compliment*

| Name             | E value    | Alignment                                     | Motif                                                                                 |
|------------------|------------|-----------------------------------------------|---------------------------------------------------------------------------------------|
| LAC9_M00207      | 8.9124e-06 | -----TACTGAATTCTGA--<br>NCGGANNRMAGWNWTCCGMKA |  |
| PXR_M01153       | 2.8134e-04 | TCAGAATTCAGTA<br>---NAGTTCA---                |  |
| HNF4alpha_M00638 | 3.0006e-04 | --TCAGAATTCAGTA<br>NKKCAAAGKTCA---            |  |

Stamp Results

04/16/09

|               |            |                                                    |                                                                                      |
|---------------|------------|----------------------------------------------------|--------------------------------------------------------------------------------------|
| Pax-5_M00144  | 3.1125e-04 | -----TCAGAATTCAGTA<br>NNNRYNGTYMCGCTYNANNNNNNCNNNY | 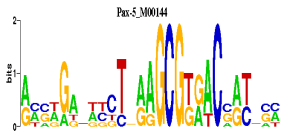  |
| WRKY_M00681   | 4.2784e-04 | TCAGAATTCAGTA-<br>----TAYTYRGTC                    |   |
| STAT5A_M00460 | 1.1024e-03 | --TCAGAATTCAGTA-----<br>TCNNNGAANNNNNNTTCCNNGNR    |   |
| CF1A_M01098   | 1.9102e-03 | -TCAGAATTCAGTA-<br>NTTNAAYTNATTAW                  |   |
| HNF6_M00639   | 2.3155e-03 | -TACTGAATTCTGA<br>NTATTGATTTN---                   |   |
| POU6F1_M00465 | 2.7103e-03 | TACTGAATTCTGA<br>--ATAAWTTATG-                     |   |
| AP-3_M00690   | 2.9314e-03 | TACTGAATTCTGA<br>--CYMAATT----                     |  |

**Motif\_2**

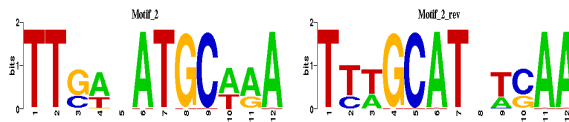

*forward*

*reverse compliment*

| <i>Name</i>  | <i>E value</i> | <i>Alignment</i>                 |
|--------------|----------------|----------------------------------|
| Oct-4_M01125 | 4.4520e-14     | -TTGANATGCAAA-<br>WTTSTNATGCAAAT |
| Oct-4_M01124 | 6.0190e-11     | --TTTGCATNTCAA<br>NWTTWGCAWNACAA |

*Motif*

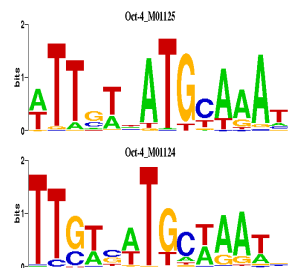

|                 |            |                                         |                                                                                       |
|-----------------|------------|-----------------------------------------|---------------------------------------------------------------------------------------|
| Oct-1_M00342    | 4.4049e-06 | --TTTGCATNTCAA<br>NATTTGCAT-----        |    |
| Oct-1_M00930    | 5.1738e-06 | TTGANATGCAAA--<br>----NATGNAAATN        |    |
| Oct-1_M00161    | 9.9342e-06 | ---TTTGCATNTCAA<br>KNATTTGCATAYY--      |    |
| Octamer_M00795  | 2.1211e-05 | --TTTGCATNTCAA<br>NATTTGCATN-----       |    |
| Oct-1_M00135    | 4.9845e-05 | -----TTTGCATNTCAA<br>NNNANATTTGCATANNNN |    |
| Sry-beta_M00666 | 7.1234e-05 | TTGANATGCAAA<br>-AGWGATGC---            |    |
| MADS-B_M00404   | 1.1431e-04 | TTTGCATNTCAA--<br>TTTSCATTTTTTRGN       |   |
| MADS-A_M00408   | 1.1473e-04 | TTTGCATNTCAA---<br>TTTCCATTTTTTNWN      |  |

**Motif\_10**

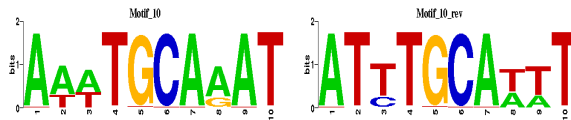

*forward*

*reverse compliment*

| <i>Name</i>  | <i>E value</i> | <i>Alignment</i>               | <i>Motif</i>                                                                          |
|--------------|----------------|--------------------------------|---------------------------------------------------------------------------------------|
| Oct-1_M00930 | 1.0206e-11     | AAWTGCAAAT--<br>-NATGNAAATN    | 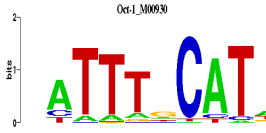 |
| Oct-1_M00161 | 4.5951e-11     | -AAWTGCAAAT--<br>RRTATGCAAATNM |  |

|                |            |                                          |
|----------------|------------|------------------------------------------|
| Oct-1_M00342   | 2.9351e-10 | AAWTGCAAAT-<br>--ATGCAAATN               |
| Oct-4_M01125   | 1.2209e-09 | ATTTGCAWTT----<br>ATTTGCATNASAAW         |
| Oct-1_M00135   | 2.0239e-09 | ---AAWTGCAAAT-----<br>NNNNTATGCAAATNTNNN |
| Octamer_M00795 | 3.7860e-09 | AAWTGCAAAT-<br>-NATGCAAATN               |
| OCT-x_M00210   | 3.9220e-08 | AAWTGCAAAT--<br>RTATGCAAATNA             |
| Oct-1_M00195   | 2.5267e-07 | ---ATTTGCAWTT-<br>NTNATTTGCATNNN         |
| MADS-B_M00404  | 6.1512e-07 | ATTTGCAWTT-----<br>-TTTSCATTTTTRGN       |
| MADS-A_M00408  | 1.4312e-06 | -----AAWTGCAAAT<br>WNWNAAAAATGGAAA-      |

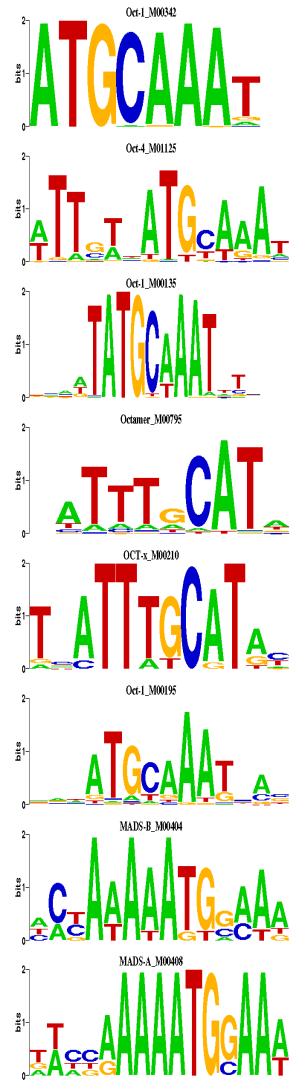

**Motif\_5**

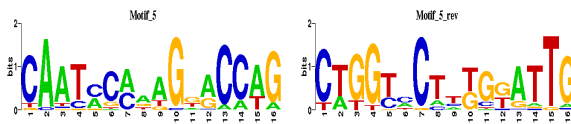

*forward*                      *reverse compliment*

| Name         | E value    | Alignment                            |
|--------------|------------|--------------------------------------|
| Pitx2_M00482 | 7.7511e-05 | CTGGTNCTNKGKATTG-<br>-----NTGGGATTAN |

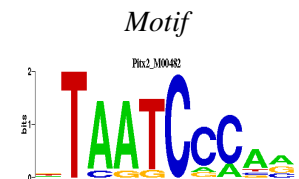

|                           |            |                                                        |                                                                                       |
|---------------------------|------------|--------------------------------------------------------|---------------------------------------------------------------------------------------|
| LUN-1_M00480              | 1.7159e-04 | CAATMCMNAGNACCAG--<br>--TCCCAAAGTAGCTGGG               |    |
| MRF-2_M00454              | 2.6489e-04 | CTGGTNCTNKGKATTG----<br>-----KNNGTATTGTNSW             |    |
| LEF1_M00805               | 5.3104e-04 | CTGGTNCTNKGKATTG<br>-----CTTTG-----                    |    |
| PPARalpha-RXRalpha_M00518 | 8.5130e-04 | --CAATMCMNAGNACCAG<br>CNTSACCCCNATGACCNN               |    |
| EBF_M00977                | 1.1559e-03 | CAATMCMNAGNACCAG<br>---NCYCWRGGGA---                   |    |
| HOXA7_M01108              | 1.9510e-03 | CTGGTNCTNKGKATTG<br>-----AGATTG                        |    |
| PBF_M01130                | 2.0304e-03 | CAATMCMNAGNACCAG<br>-----AAAG-----                     |   |
| AR_M00953                 | 3.2172e-03 | -----CAATMCMNAGNACCAG---<br>NNNNNNAGAACACNNTGTNCYNNNNN |  |
| OCT-x_M00210              | 4.7987e-03 | CTGGTNCTNKGKATTG<br>----TNATTTGCATAY                   |  |

**Motif\_4**

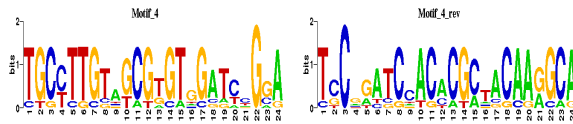

*forward*

*reverse compliment*

*Name*

*E value*

*Alignment*

*Motif*

Stamp Results

04/16/09

|                  |            |                                                                |
|------------------|------------|----------------------------------------------------------------|
| ARR10_M01050     | 4.4376e-05 | TCCNGATCCACACGCTACAAGGCA<br>--MRNATC-----                      |
| FACB_M00389      | 1.0170e-04 | ---TCCNGATCCACACGCTACAAGGCA<br>ANNNGCNRMNAAAMNCTGCNNNN--       |
| Pax-5_M00144     | 2.8090e-03 | -----TGCCTTGTAGCGTGTGGATCNGGA<br>RNNNGNNNNNTNRAGCGKRACNRYNNN-- |
| Tra-1_M01049     | 4.1863e-03 | TGCCTTGTAGCGTGTGGATCNGGA<br>-----GGNGGT-----                   |
| Pax-4_M00373     | 5.4883e-03 | TGCCTTGTAGCGTGTGGATCNGGA<br>-GNNKTCANGCGTGNSNNNN---            |
| Sp3_M00665       | 6.7747e-03 | TCCNGATCCACACGCTACAAGGCA<br>-----CCCYSCCAAGKS-                 |
| LEF1_M00805      | 7.4009e-03 | TGCCTTGTAGCGTGTGGATCNGGA<br>--CTTIG-----                       |
| HAC1_M00730      | 7.5088e-03 | TGCCTTGTAGCGTGTGGATCNGGA<br>----GMCAGCGTGTC-----               |
| NF-kappaB_M00051 | 9.5336e-03 | TGCCTTGTAGCGTGTGGATCNGGA<br>-----GGGRATCCC--                   |
| CACD_M01113      | 1.1315e-02 | TGCCTTGTAGCGTGTGGATCNGGA<br>-----GGGYGTG-----                  |

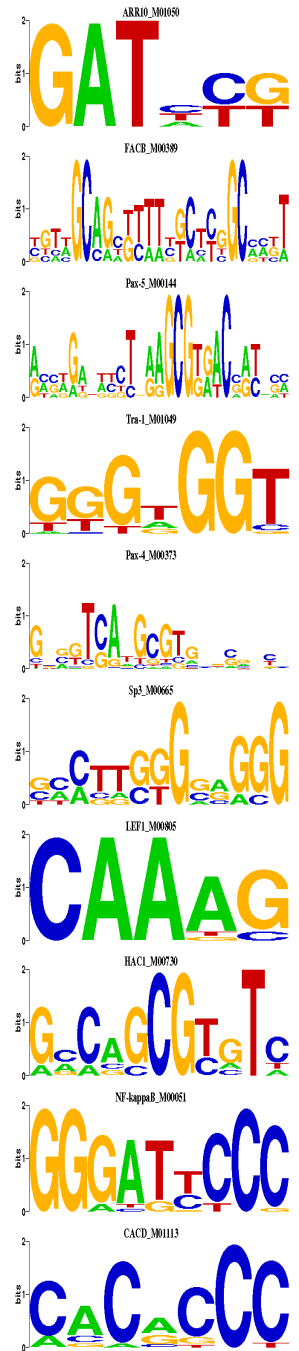

Motif\_8

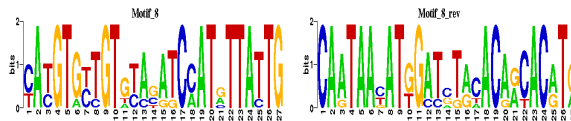

*forward*

*reverse compliment*



| Name              | E value    | Alignment                                                 | Motif                                                                                 |
|-------------------|------------|-----------------------------------------------------------|---------------------------------------------------------------------------------------|
| Opaque-2_M00374   | 3.9476e-06 | CAATAAYATGGATSTACACARCACATG<br>--ATGAYATGG-----           |    |
| TWI_M01103        | 1.3335e-05 | CAATAAYATGGATSTACACARCACATG<br>-----NNGCNNMACAYAT-        |    |
| CRP_M00202        | 4.3897e-05 | CATGTGYTGTGTASATCCATRTTATTG<br>-WANTGTGANNYNNTCACAWTWATT- |    |
| TFE_M01029        | 1.4757e-04 | CAATAAYATGGATSTACACARCACATG<br>-----NCACATG               |    |
| ATHB-5_M00503     | 3.1301e-04 | CAATAAYATGGATSTACACARCACATG<br>CAATNATT-----              |    |
| bHLH66_M01054     | 5.8229e-04 | CAATAAYATGGATSTACACARCACATG<br>-----GCACGTG               |   |
| BRCA1-USF2_M01082 | 9.7729e-04 | CAATAAYATGGATSTACACARCACATG<br>-----CAACNNN--             |  |
| MATalpha2_M00031  | 1.6817e-03 | CAATAAYATGGATSTACACARCACATG<br>-NWNACAYG-----             |  |
| RITA-1_M00660     | 1.8787e-03 | CAATAAYATGGATSTACACARCACATG<br>-----SACGTR                |  |
| POU3F2_M00464     | 2.6381e-03 | CAATAAYATGGATSTACACARCACATG<br>-ATTARCATA-----            |  |

Motif\_12

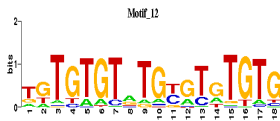

forward

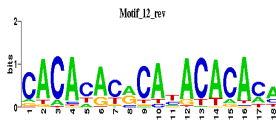

reverse compliment

| Name            | E value    | Alignment                                  | Motif                                                                                 |
|-----------------|------------|--------------------------------------------|---------------------------------------------------------------------------------------|
| RAP1_M00213     | 5.1544e-07 | NKTGTGNTGYGTRTGTG<br>--NRTGTATGGGTKY---    | 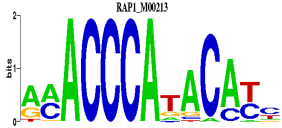   |
| Tax-CREB_M00115 | 4.3219e-05 | NKTGTGNTGYGTRTGTG<br>-GGGGRATGCGTCA---     |    |
| FOXP1_M00987    | 6.0635e-05 | -CACAYACRCANACACAMN<br>ATAAAAAACAACACAAATA |    |
| NGFI-C_M00244   | 6.8421e-05 | -CACAYACRCANACACAMN<br>CCRCCCACGCA-----    |    |
| Egr-3_M00245    | 1.5210e-04 | CACAYACRCANACACAMN<br>-----ACGCCACGCA--    |    |
| Egr-2_M00246    | 2.0592e-04 | CACAYACRCANACACAMN<br>-----MCGCCCACGCA--   |   |
| Pit-1_M00802    | 2.0641e-04 | CACAYACRCANACACAMN<br>-MTTCATNNWTATNNNNN   |  |
| Egr-1_M00243    | 3.5130e-04 | NKTGTGNTGYGTRTGTG<br>--TGCGTGGGCGK-----    |  |
| CACD_M01113     | 6.4645e-04 | CACAYACRCANACACAMN<br>--CACRCCC-----       |  |
| HFH4_M00742     | 2.2067e-03 | NKTGTGNTGYGTRTGTG<br>--WKTGTTTGTTA-----    |  |

**Motif\_3**

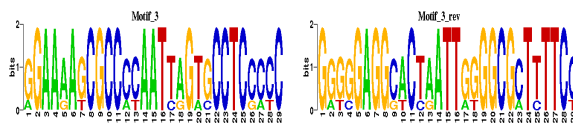

*forward*

*reverse compliment*

| Name             | E value    | Alignment                                                           | Motif                                                                                 |
|------------------|------------|---------------------------------------------------------------------|---------------------------------------------------------------------------------------|
| En_M00696        | 2.3193e-06 | GGAAAAGCGCCCCAATTAGTGCCTCCCC<br>-----CAATTA-----                    | 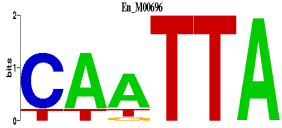   |
| HOXA5_M00023     | 2.8121e-06 | --GGGGGAGGCACTAATTGGGGCGCTTTTCC<br>NGRNNNNNNNNNANTAATGRNGNNNNNNGC-- |    |
| HOXA4_M00640     | 4.2207e-06 | GGAAAAGCGCCCCAATTAGTGCCTCCCC<br>-----CYAATTW-----                   |    |
| TFII-I_M00706    | 5.4830e-06 | GGAAAAGCGCCCCAATTAGTGCCTCCCC<br>-----CCTMCNTC-----                  |    |
| Pax-4_M00380     | 1.5795e-05 | -GGGGGAGGCACTAATTGGGGCGCTTTTCC<br>NGNGTGNNNNNNNNNNNNNNNNTAWTTTN-    |    |
| ATHB-5_M00503    | 4.2772e-05 | GGAAAAGCGCCCCAATTAGTGCCTCCCC<br>-----AATNATTG-----                  |   |
| UF1H3BETA_M01068 | 7.4050e-05 | --GGGGGAGGCACTAATTGGGGCGCTTTTCC<br>GYGGGGGAGGGGC-----               |  |
| MAZ_M00649       | 1.0199e-04 | GGAAAAGCGCCCCAATTAGTGCCTCCCC<br>-----CCCTCC--                       |  |
| Nkx2-5_M00241    | 1.2150e-04 | GGAAAAGCGCCCCAATTAGTGCCTCCCC<br>-----NAATTAW-----                   |  |
| E2F-1_M00939     | 4.6967e-04 | GGAAAAGCGCCCCAATTAGTGCCTCCCC<br>-----CGCGCSAA-----                  |  |

**Motif\_11**

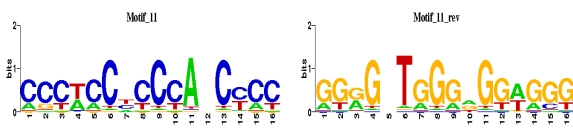

*forward*

*reverse compliment*

| Name               | E value    | Alignment                              | Motif                                                                                 |
|--------------------|------------|----------------------------------------|---------------------------------------------------------------------------------------|
| ZNF219_M01122      | 5.1682e-07 | -CCCWCCNCCCANCYCC<br>NCCCCCNCCC-----   | 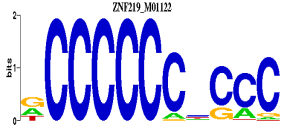   |
| VDR_M00444         | 1.4762e-06 | CCCWCCNCCCANCYCC<br>-TSWCCYYNYTNMCC-   |    |
| UF1H3BETA_M01068   | 3.3541e-06 | --CCCWCCNCCCANCYCC<br>GCCCTCCCCRC----- |    |
| KROX_M00982        | 1.2985e-05 | GGRGNTGGGNGGWGGG<br>GNNGNGGGGGCGG---   |    |
| MAZ_M00649         | 1.6038e-05 | CCCWCCNCCCANCYCC<br>CCCTCC-----        |    |
| AtMYB-84_M00970    | 4.0469e-05 | CCCWCCNCCCANCYCC<br>----SCACCTACCNC    |   |
| CAC-binding_M00720 | 7.2713e-05 | GGRGNTGGGNGGWGGG<br>-----RGGSTGG       |  |
| Lyf-1_M00141       | 1.6046e-04 | CCCWCCNCCCANCYCC<br>----YCTCCCAA----   |  |
| Tra-1_M01048       | 2.1934e-04 | GGRGNTGGGNGGWGGG<br>-----GGWGGT----    |  |
| TFII-I_M00706      | 2.3594e-04 | CCCWCCNCCCANCYCC<br>-CCTMCNTC-----     |  |

Motif\_9

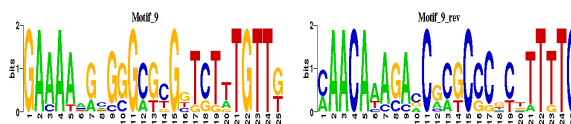

*forward*                      *reverse compliment*

| <i>Name</i>    | <i>E value</i> | <i>Alignment</i>                                           | <i>Motif</i> |
|----------------|----------------|------------------------------------------------------------|--------------|
| STE11_M01005   | 1.2779e-05     | CAACAAAGANCGCGCCNCNNTTTTC<br>GAACAAAGAAA-----              |              |
| Mat1-Mc_M00275 | 3.3878e-05     | ----CAACAAAGANCGCGCCNCNNTTTTC<br>NRMNNAACAAAGANRYC-----    |              |
| SRY_M00148     | 4.0988e-05     | CAACAAAGANCGCGCCNCNNTTTTC<br>-AACANM-----                  |              |
| ZAP1_M00735    | 8.1564e-05     | CAACAAAGANCGCGCCNCNNTTTTC<br>-----TGACCGAGY-----           |              |
| SOX_M01014     | 1.1660e-04     | ---CAACAAAGANCGCGCCNCNNTTTTC<br>NCNTAACAAAGA-----          |              |
| ZF5_M00333     | 1.8894e-04     | CAACAAAGANCGCGCCNCNNTTTTC<br>-----NWGCGGYNYNY-----         |              |
| LEF1_M00805    | 1.9076e-04     | GAAAANGNGGGCGCGNTCTTTGTTG<br>-----CTTTG---                 |              |
| NRSF_M00256    | 2.1431e-04     | ----CAACAAAGANCGCGCCNCNNTTTTC<br>TCAGCACCACGGACAGCRSC----- |              |
| HFH4_M00742    | 3.2897e-04     | -CAACAAAGANCGCGCCNCNNTTTTC<br>TAAACAAACAMW-----            |              |
| KROX_M00982    | 6.9677e-04     | GAAAANGNGGGCGCGNTCTTTGTTG<br>---GNNGNGGGGGCGG-----         |              |

**Motif\_6**

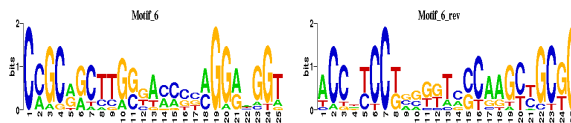

*forward*                      *reverse compliment*

| <i>Name</i>        | <i>E value</i> | <i>Alignment</i>                                          | <i>Motif</i>                                                                          |
|--------------------|----------------|-----------------------------------------------------------|---------------------------------------------------------------------------------------|
| PEA3_M00655        | 1.3863e-05     | CCGCRGCTTGSNAMMNNMGGRRNGGT<br>-----MGGAWG--               |    |
| Tra-1_M01048       | 5.2093e-05     | ACCNYYCKNNKKTNSCAAGCYGCGG<br>ACCWCC-----                  |    |
| PU.1_M00658        | 3.8276e-04     | ACCNYYCKNNKKTNSCAAGCYGCGG<br>--CTTCTC-----                |    |
| LBP-1_M00644       | 3.8363e-04     | CCGCRGCTTGSNAMMNNMGGRRNGGT<br>--SCAGCN-----               |    |
| c-Ets-1_M00743     | 3.9782e-04     | ACCNYYCKNNKKTNSCAAGCYGCGG<br>-GCTTCK-----                 |   |
| Tra-1_M01049       | 9.7222e-04     | ACCNYYCKNNKKTNSCAAGCYGCGG<br>ACCNCC-----                  |  |
| Ets_M00971         | 1.1419e-03     | CCGCRGCTTGSNAMMNNMGGRRNGGT<br>-----NAGGAAG--              |  |
| Olf-1_M00261       | 3.1243e-03     | ---ACCNYYCKNNKKTNSCAAGCYGCGG<br>NCMNNYTCCNRRGGANTNGN----- |  |
| Tel-2_M00678       | 3.3696e-03     | CCGCRGCTTGSNAMMNNMGGRRNGGT<br>-----CAGGAAGTA              |  |
| c-Ets-1_p54_M00032 | 3.5880e-03     | ACCNYYCKNNKKTNSCAAGCYGCGG<br>NRCWTCCG-----                |  |

**Motif\_7**

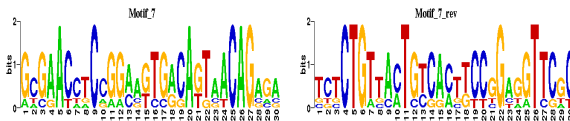

|                    | <i>forward</i> | <i>reverse compliment</i>                                   |                                                                                       |
|--------------------|----------------|-------------------------------------------------------------|---------------------------------------------------------------------------------------|
| <i>Name</i>        | <i>E value</i> | <i>Alignment</i>                                            | <i>Motif</i>                                                                          |
| BLIMP1_M01066      | 8.8016e-09     | TCTCTGTTACTGTCACTTCCGGAGGTTTCGC<br>-----YMCTTTCMCTTYC-----  |    |
| GABP_M00341        | 1.3725e-07     | TCTCTGTTACTGTCACTTCCGGAGGTTTCGC<br>-----YGCNCTTCCGG-----    |    |
| Nrf-2_M00108       | 4.2402e-07     | GCGAACCTCCGGAAGTGACAGTAACAGAGA<br>-----CCGGAAGNS-----       |    |
| c-Ets-1_p54_M00032 | 5.7446e-05     | GCGAACCTCCGGAAGTGACAGTAACAGAGA<br>-----CMGGAWGYN-----       |    |
| Tel-2_M00678       | 1.3932e-04     | TCTCTGTTACTGTCACTTCCGGAGGTTTCGC<br>-----TACTTCTG-----       |    |
| ANT_M00501         | 1.4112e-04     | GCGAACCTCCGGAAGTGACAGTAACAGAGA<br>-----CMTYGGGAWN TGT-----  |   |
| SOX_M01014         | 1.4978e-04     | GCGAACCTCCGGAAGTGACAGTAACAGAGA<br>-----NCNTAACAAAGA         |  |
| LXR_M00766         | 2.4248e-04     | TCTCTGTTACTGTCACTTCCGGAGGTTTCGC<br>-----GGGTACTNCCGGTC----- |  |
| HSF_M00641         | 4.1429e-04     | TCTCTGTTACTGTCACTTCCGGAGGTTTCGC<br>-----TCNMGNRGYTT C-----  |  |
| STAT1_M00492       | 4.2149e-04     | GCGAACCTCCGGAAGTGACAGTAACAGAGA<br>-----SGGAANT-----         |  |

Sequence logo generation powered by [weblogo](#)  
 STAMP is written by [Shaun Mahony](#)
