# Supplementary material for: In silico identification of a core regulatory network of OCT4 in human embryonic stem cells using an integrated approach
Source: PubMed Central journal article supplement (PMC2714862; doi:10.1186/1471-2164-10-314), 2009-07-15
Supplement: 1471-2164-10-314-S9.pdf [file 1471-2164-10-314-S9.pdf]

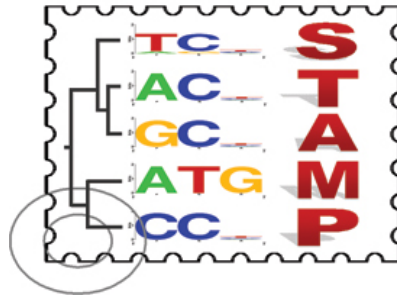

Jump to: [Multiple Alignment](#) [Motif Tree](#) [Motif Matching](#)

Input file: 12 motifs loaded

Settings: Metric=PCC, Alignment=SWU, Gap-open=1000, Gap-extend=1000, -nooverlapalign

Multiple Alignment=IR, Tree=UPGMA, Matching against: JASPAR

Note: All results files are removed nightly at midnight EST. Please save your results by saving "Webpage, complete".

[Download results as a PDF](#)

[Click here to run STAMP again.](#)

## Multiple Alignment

(Consensus sequence representations shown, but multiple alignment was carried out on the matrices)

```

Motif_1: -----TCAGAATTCAGTA-----
Motif_2: -----TTGANATGCAAA-----
Motif_3: -----GGAAAAGCGCCCAATTAGTGCCTCCCC
Motif_4: -----TCCNGATCCACACGCTACAAGGCA-----
Motif_5: -----CAATMCMNAGNACCAG-----
Motif_6: -----ACCN YCCKNNKKTNSCAAGCYGCGG-----
Motif_7: GCGAACCTCCGGAAGTGACAGTAACAGAGA-----
Motif_8: -----CAATAAYATGGATSTACACARCACATG-----
Motif_9: -----CAACAAAGANCGCGCCCNCTTTTC-----
Motif_10: -----AAWTGCAAAT-----
Motif_11: -----CCWCCNCCANCYCC-----
Motif_12: -----CACAYACRCANACACAMN-----

```

**Familial Profile:**  
([click for matrix](#))

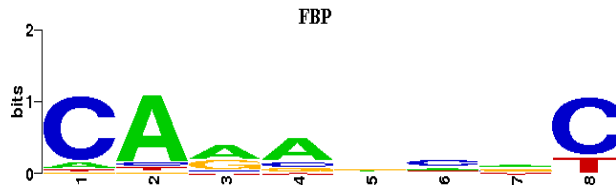

# Motif Tree

Tree (drawn by [PhyIip](#))

[Click here for Newick-format tree](#) (viewable with [MEGA](#))

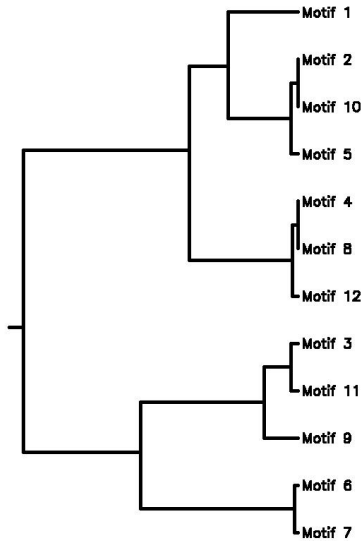

| Input Motif            | Best match in JASPAR                          |
|------------------------|-----------------------------------------------|
| <p><b>Motif 1</b></p>  | <p><b>NR2F1</b><br/>(E val: 2.5413e-03)</p>   |
| <p><b>Motif 2</b></p>  | <p><b>HMG-IY</b><br/>(E val: 1.7118e-05)</p>  |
| <p><b>Motif 10</b></p> | <p><b>HMG-IY</b><br/>(E val: 3.3314e-06)</p>  |
| <p><b>Motif 5</b></p>  | <p><b>REST</b><br/>(E val: 9.2402e-03)</p>    |
| <p><b>Motif 4</b></p>  | <p><b>ZNF354C</b><br/>(E val: 3.9705e-05)</p> |
| <p><b>Motif 8</b></p>  | <p><b>Mycn</b><br/>(E val: 7.5450e-04)</p>    |
| <p><b>Motif 12</b></p> | <p><b>CF2-II</b><br/>(E val: 5.0163e-03)</p>  |
| <p><b>Motif 3</b></p>  | <p><b>Pax4</b></p>                            |

|                                                                                                           |                                                                                                                                   |
|-----------------------------------------------------------------------------------------------------------|-----------------------------------------------------------------------------------------------------------------------------------|
| 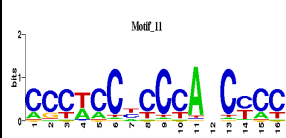 <p><b>Motif 11</b></p> |  <p><b>Pax4</b><br/>(E val: 4.8136e-11)</p>    |
|  <p><b>Motif 9</b></p>  |  <p><b>MNB1A</b><br/>(E val: 6.5278e-04)</p>   |
|  <p><b>Motif 6</b></p>  |  <p><b>Eip74EF</b><br/>(E val: 3.0567e-04)</p> |
|  <p><b>Motif 7</b></p>  |  <p><b>ELK4</b><br/>(E val: 2.2790e-06)</p>    |

### Motif Similarity Matches

#### Motif\_1

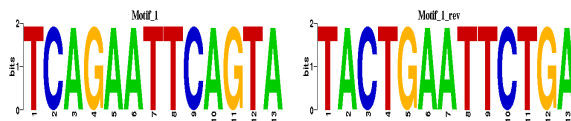

*forward*

*reverse compliment*

| Name         | E value    | Alignment                              | Motif                                                                                 |
|--------------|------------|----------------------------------------|---------------------------------------------------------------------------------------|
| NR2F1        | 2.5413e-03 | ----TCAGAATTCAGTA<br>NNGKNCAAAGKTCA--- | 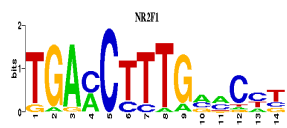 |
| Lhx3_v2HOMEO | 7.9667e-03 | TCAGAATTCAGTA---<br>---WAATTAATTAWYN   |  |
| Prrx2        | 8.5980e-03 | TCAGAATTCAGTA<br>---TAATT-----         |  |

Stamp Results

04/16/09

|           |            |                                             |                                                                                      |
|-----------|------------|---------------------------------------------|--------------------------------------------------------------------------------------|
| NKX3-1    | 9.7950e-03 | TCAGAATTCAGTA-<br>-----TAAGTAT              |   |
| Pax6      | 1.2029e-02 | TACTGAATTCTGA-<br>MANTSAWGCGTGAA            |   |
| Staf      | 1.2673e-02 | -TACTGAATTCTGA-----<br>KCNNKGMANNMTGGGANNNN |   |
| Lhx3      | 1.5097e-02 | -TACTGAATTCTGA<br>WTAATTART-----            |   |
| HNF4A     | 2.0847e-02 | TACTGAATTCTGA---<br>---TGNMCTTTGNNCY        |   |
| NF-kappaB | 3.2152e-02 | TACTGAATTCTGA<br>--GGAMTTYCC-               |   |
| Athb-1    | 3.3186e-02 | TCAGAATTCAGTA<br>-AATAATTN-----             |  |

Motif\_2

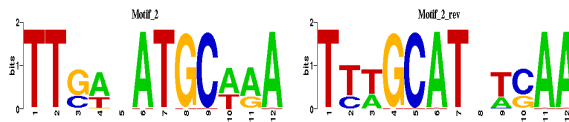

*forward*

*reverse compliment*

| Name   | E value    | Alignment                           | Motif                                                                                 |
|--------|------------|-------------------------------------|---------------------------------------------------------------------------------------|
| HMG-IY | 1.7118e-05 | ---TTTGCATNTCAA-<br>RTTTYKNYNTTNTNN | 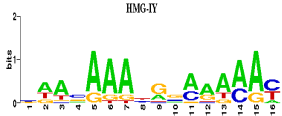 |
| SQUA   | 1.0237e-03 | -TTGANATGCAAA-<br>MCAWAWATRGNAAN    |  |

|                 |            |                                        |                                                                                       |
|-----------------|------------|----------------------------------------|---------------------------------------------------------------------------------------|
| Broad-complex_2 | 3.4060e-02 | TTGANATGCAAA<br>---AAATAGNW-           | 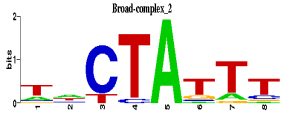   |
| NR2F1           | 3.4076e-02 | -----TTTGCATNTCAA<br>TGAMCTTTGNMCNN--- |    |
| HMG-1           | 3.9254e-02 | TTTGCATNTCAA-<br>----GANNACAAC         |    |
| STAT1           | 3.9268e-02 | TTGANATGCAAA--<br>RGAAANNGAAACTN       |    |
| RELA            | 4.2426e-02 | TTTGCATNTCAA<br>-GGGANTTTCC-           |    |
| NR1H2-RXRA      | 7.1076e-02 | -TTTGCATNTCAA----<br>STTGACCTTTGACCTTT |    |
| MNB1A           | 7.9661e-02 | TTTGCATNTCAA<br>---NCTTT----           |   |
| DI_2            | 8.2895e-02 | TTGANATGCAAA<br>-GGAAAWCCCC-           |  |

**Motif\_10**

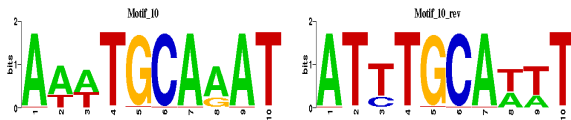

*forward*

*reverse compliment*

| <i>Name</i> | <i>E value</i> | <i>Alignment</i>                    | <i>Motif</i>                                                                          |
|-------------|----------------|-------------------------------------|---------------------------------------------------------------------------------------|
| HMG-IY      | 3.3314e-06     | --ATTTGCAWTT----<br>RTTYKKNYNTTNTNN |  |
| SQUA        | 9.4765e-05     | ----AAWTGCAAAT<br>MCAWAWATRGNAAN    |  |

Stamp Results

04/16/09

|                 |            |                                                            |  |
|-----------------|------------|------------------------------------------------------------|--|
| STAT1           | 8.7206e-04 | -ATTTGCAWTT---<br>NAGTTTCNNTTTCY                           |  |
| Pax4            | 1.4392e-03 | -----AAWTGCAAAT-----<br>RAAWAWWWNNMNNNNNNNNNNNNNNMNNNNNYMC |  |
| Broad-complex_1 | 1.5224e-03 | -ATTTGCAWTT---<br>NWYTTGTYYTATNAN                          |  |
| Cebpa           | 1.4695e-02 | ATTTGCAWTT--<br>TTNNNCAAYNNN                               |  |
| HMG-1           | 1.7196e-02 | AAWTGCAAAT<br>GANNACAAC-                                   |  |
| Ddit3-Cebpa     | 2.2941e-02 | --AAWTGCAAAT<br>GSNATTGCAYNN                               |  |
| NR2F1           | 2.4345e-02 | ----ATTTGCAWTT<br>TGAMCTTTGNMCNN                           |  |
| Foxa2           | 2.9932e-02 | AAWTGCAAAT----<br>--AARYAAATANTN                           |  |

Motif\_5

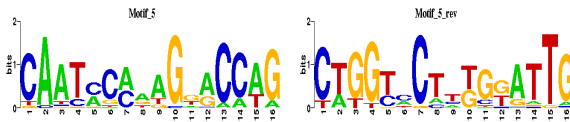

*forward*

*reverse compliment*

*Name*

*E value*

*Alignment*

*Motif*

REST

9.2402e-03

--CTGGTNCNTNKGKATTG-  
GNGCTGTCCNWGGTGCTGA

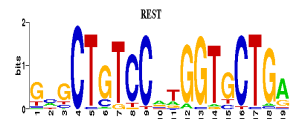

Stamp Results

04/16/09

|             |            |                                                  |                                                                                       |
|-------------|------------|--------------------------------------------------|---------------------------------------------------------------------------------------|
| Ddit3-Cebpa | 1.3404e-02 | CTGGTNCNTNKGKATTG-----<br>-----GSNATTGCAYNN      | 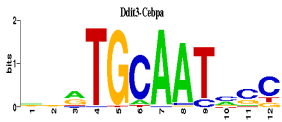   |
| ovo         | 1.4403e-02 | -CTGGTNCNTNKGKATTG<br>NCNGTTACW-----             |    |
| NR1H2-RXRA  | 3.1690e-02 | -CAATMCMNAGNACCAG<br>AAAGGTCAAAGGTCAAS           |    |
| Ar          | 4.2602e-02 | ----CAATMCMNAGNACCAG--<br>NNNAGNACANNNTGTNCCNNMN |    |
| BRCA1       | 4.3790e-02 | CTGGTNCNTNKGKATTG-<br>-----SNGTTGN               |    |
| HMG-1       | 4.6224e-02 | CAATMCMNAGNACCAG<br>GANNACAAC-----               |    |
| ZNF354C     | 4.6687e-02 | CTGGTNCNTNKGKATTG<br>-----GTGGAK--               |   |
| sna         | 4.7824e-02 | CAATMCMNAGNACCAG<br>-----CACCTG                  |  |
| id1         | 5.0259e-02 | CTGGTNCNTNKGKATTG<br>TNKYNNNTNNCG----            |  |

Motif\_4

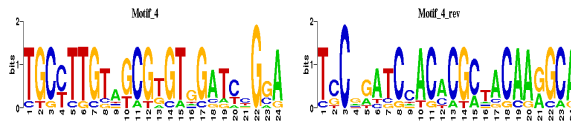

*forward*

*reverse compliment*

*Name*

*E value*

*Alignment*

*Motif*

Stamp Results

04/16/09

|          |            |                                                       |                                                                                       |
|----------|------------|-------------------------------------------------------|---------------------------------------------------------------------------------------|
| ZNF354C  | 3.9705e-05 | TGCCTTGTAGCGTGTGGATCNGGA<br>-----GTGGAK-----          | 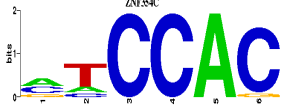   |
| Arnt-Ahr | 2.5357e-03 | TCCNGATCCACACGCTACAAGGCA<br>-----CACGCN-----          |    |
| ARR10    | 6.9143e-03 | TCCNGATCCACACGCTACAAGGCA<br>-NMRNATCT-----            |    |
| MNB1A    | 1.2029e-02 | TGCCTTGTAGCGTGTGGATCNGGA<br>-NCTTT-----               |    |
| PBF      | 2.0724e-02 | TCCNGATCCACACGCTACAAGGCA<br>-----AAAGY-----           |    |
| Eip74EF  | 3.3313e-02 | TGCCTTGTAGCGTGTGGATCNGGA<br>-----YTCCGG-----          |    |
| Dof2     | 4.0010e-02 | TGCCTTGTAGCGTGTGGATCNGGA<br>NGCTTT-----               |   |
| Pax5     | 5.3635e-02 | --TGCCTTGTAGCGTGTGGATCNGGA<br>NGNNNNNYGNWGCGRRCR----- |  |
| GATA2    | 5.5833e-02 | TGCCTTGTAGCGTGTGGATCNGGA<br>-----NGATN-----           |  |
| NFKB1    | 5.6928e-02 | TCCNGATCCACACGCTACAAGGCA<br>GGGGAATCCCC-----          |  |

Motif\_8

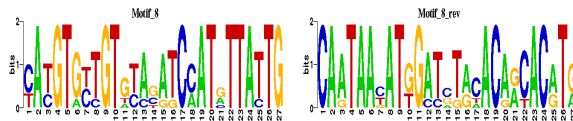

*forward*

*reverse compliment*



| Name    | E value    | Alignment                                                | Motif |
|---------|------------|----------------------------------------------------------|-------|
| Mycn    | 7.5450e-04 | CATGTGYTGTGTASATCCATRTTATTG<br>CACGTG-----               |       |
| Arnt    | 1.3445e-03 | CAATAAYATGGATSTACACARCACATG<br>-----CACGTG               |       |
| BRCA1   | 6.4320e-03 | CATGTGYTGTGTASATCCATRTTATTG<br>---SNGTTGN-----           |       |
| USF1    | 6.6699e-03 | CAATAAYATGGATSTACACARCACATG<br>-----NCACGTG              |       |
| Athb-1  | 2.0170e-02 | CATGTGYTGTGTASATCCATRTTATTG<br>-----NAATTATT-            |       |
| MYC-MAX | 2.0730e-02 | --CATGTGYTGTGTASATCCATRTTATTG<br>ACCACGTGSTN-----        |       |
| ZNF354C | 2.2552e-02 | CAATAAYATGGATSTACACARCACATG<br>-----GTGGAK-----          |       |
| EMBP1   | 2.3024e-02 | -CATGTGYTGTGTASATCCATRTTATTG<br>CCACGTST-----            |       |
| sna     | 3.7716e-02 | CAATAAYATGGATSTACACARCACATG<br>-----CACCTG               |       |
| REST    | 4.1289e-02 | CATGTGYTGTGTASATCCATRTTATTG-<br>-----GNGCTGTCCNWGGTGCTGA |       |

Motif\_12

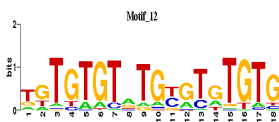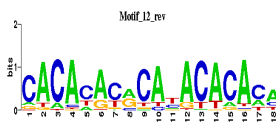

forward

reverse compliment

| Name     | E value    | Alignment                                   | Motif |
|----------|------------|---------------------------------------------|-------|
| CF2-II   | 5.0163e-03 | CACAYACRCANACACAMN<br>---NTAYATATAY-----    |       |
| Arnt-Ahr | 1.1257e-02 | CACAYACRCANACACAMN<br>---CACGCN-----        |       |
| HMG-IY   | 1.1601e-02 | -CACAYACRCANACACAMN<br>NNANAAANRNMRAAA Y--- |       |
| RREB1    | 1.8612e-02 | --NKTGTGTNTGYGTRTGTG<br>NGKKKGKGGGTGKTTTGGG |       |
| T        | 1.9860e-02 | CACAYACRCANACACAMN<br>--TTCACACCTAG-----    |       |
| Foxd3    | 3.0420e-02 | CACAYACRCANACACAMN<br>-AAANAAACAWTN-----    |       |
| FOXI1    | 3.4243e-02 | ---NKTGTGTNTGYGTRTGTG<br>NNNTRTTTRTWT-----  |       |
| ZNF354C  | 5.0221e-02 | NKTGTGTNTGYGTRTGTG<br>---GTGGAK-----        |       |
| Foxq1    | 6.9039e-02 | -NKTGTGTNTGYGTRTGTG<br>NATTGTTTATW-----     |       |
| Pax6     | 6.9676e-02 | NKTGTGTNTGYGTRTGTG<br>--MANTSAWGCGTGAA--    |       |

Motif\_3

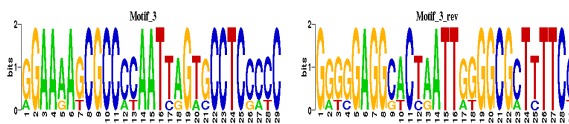

*forward*

*reverse compliment*

| Name    | E value    | Alignment                                                       | Motif |
|---------|------------|-----------------------------------------------------------------|-------|
| Pax4    | 4.8136e-11 | -GGGGAGGCACTAATTGGGGCGCTTTTCC<br>GKRNNNNKNNNNNNNNNNKNNWWWWTWTTY |       |
| Pdx1    | 6.0028e-06 | GGAAAAGCGCCCCAATTAGTGCCTCCCC<br>-----AATTAG-----                |       |
| Prrx2   | 1.3008e-04 | GGGGAGGCACTAATTGGGGCGCTTTTCC<br>-----TAATT-----                 |       |
| Dof3    | 1.8685e-04 | GGGGAGGCACTAATTGGGGCGCTTTTCC<br>-----NRCTTT-----                |       |
| MNB1A   | 2.2225e-04 | GGGGAGGCACTAATTGGGGCGCTTTTCC<br>-----NCTTT-----                 |       |
| dl_1    | 3.1884e-04 | GGGGAGGCACTAATTGGGGCGCTTTTCC-<br>-----SGGGTTTTTCCN              |       |
| PBF     | 3.2872e-04 | GGGGAGGCACTAATTGGGGCGCTTTTCC<br>-----RCTTT-----                 |       |
| Agamous | 3.7219e-04 | GGAAAAGCGCCCCAATTAGTGCCTCCCC<br>-----NCCNNWTTWGG-----           |       |
| Nkx2-5  | 4.7794e-04 | GGAAAAGCGCCCCAATTAGTGCCTCCCC<br>-----CAMTTAW-----               |       |
| ATHB5   | 5.6424e-04 | GGGGAGGCACTAATTGGGGCGCTTTTCC<br>-----AATMATTGN-----             |       |

**Motif\_11**

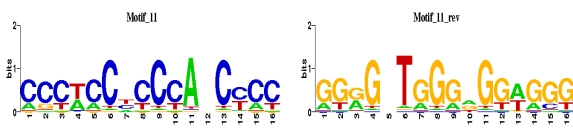

*forward*

*reverse compliment*

| Name      | E value    | Alignment                                                  | Motif                                                                                 |
|-----------|------------|------------------------------------------------------------|---------------------------------------------------------------------------------------|
| Pax4      | 6.5278e-04 | GGRGNTGGGNGGWGGG-----<br>-GKRNNNNNKNNNNNNNNNNNNKNNWWWTWTTY | 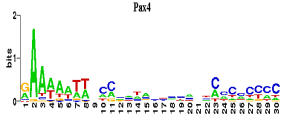   |
| RREB1     | 1.3388e-03 | -----GGRGNTGGGNGGWGGG<br>NGKKKGKGGGTGKTTTGGGG-             |    |
| Klf4      | 9.3992e-03 | CCCWCCNCCCANCYCC<br>CCTTYYYTTN-----                        |    |
| MZF1_1-4  | 2.0693e-02 | CCCWCCNCCCANCYCC<br>---TCCCN-----                          |    |
| SP1       | 2.5923e-02 | CCCWCCNCCCANCYCC<br>-----ACCCNGCCNN                        |    |
| MZF1_5-13 | 3.3083e-02 | CCCWCCNCCCANCYCC<br>--NTNCCCCTMN----                       |   |
| ZNF354C   | 6.7150e-02 | CCCWCCNCCCANCYCC<br>--MTCCAC-----                          |  |
| ZEB1      | 7.1363e-02 | GGRGNTGGGNGGWGGG<br>-----NAGGTG--                          |  |
| TFAP2A    | 7.6314e-02 | GGRGNTGGGNGGWGGG<br>---GCCNNNNGS----                       |  |
| sna       | 8.2609e-02 | GGRGNTGGGNGGWGGG<br>-----CAGGTG--                          |  |

Motif\_9

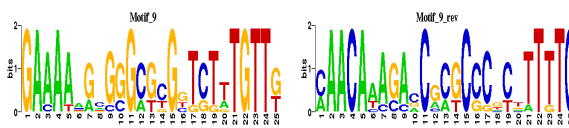

*forward*                      *reverse compliment*

| <i>Name</i> | <i>E value</i> | <i>Alignment</i>                                           | <i>Motif</i> |
|-------------|----------------|------------------------------------------------------------|--------------|
| MNB1A       | 3.1854e-04     | CAACAAAGANCGCGCCNCNTTTTTC<br>-----NCTTT---                 |              |
| REST        | 6.5926e-04     | ----CAACAAAGANCGCGCCNCNTTTTTC<br>TCAGCACCCWNGGACAGCNC----- |              |
| Dof3        | 8.5118e-04     | CAACAAAGANCGCGCCNCNTTTTTC<br>-----NRCTTT---                |              |
| PBF         | 1.1530e-03     | CAACAAAGANCGCGCCNCNTTTTTC<br>-----RCTTT---                 |              |
| Dof2        | 2.6836e-03     | CAACAAAGANCGCGCCNCNTTTTTC<br>-----NGCTTT---                |              |
| dl_1        | 7.0677e-03     | CAACAAAGANCGCGCCNCNTTTTTC--<br>-----SGGGTTTTTCCN           |              |
| SP1         | 1.0486e-02     | CAACAAAGANCGCGCCNCNTTTTTC<br>-----ACCCNGCCNN-----          |              |
| Sox5        | 1.3638e-02     | GAAAANGNGGGCGGNTCTTTGTTG<br>-----ATTGTTN                   |              |
| FOX11       | 1.9751e-02     | CAACAAAGANCGCGCCNCNTTTTTC<br>AWAYAAAAYANNN-----            |              |
| Foxd3       | 1.9823e-02     | CAACAAAGANCGCGCCNCNTTTTTC<br>AAANAAACAWTN-----             |              |

**Motif\_6**

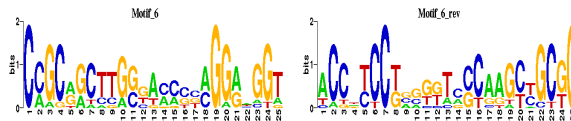

*forward**reverse compliment*

| <i>Name</i> | <i>E value</i> | <i>Alignment</i>                                                                                      | <i>Motif</i>                                                                          |
|-------------|----------------|-------------------------------------------------------------------------------------------------------|---------------------------------------------------------------------------------------|
| Eip74EF     | 3.0567e-04     | ACCN <sup>Y</sup> CC <sup>K</sup> NN <sup>K</sup> KTNSCAAGCYGCGG<br>--YTTCGG-----                     | 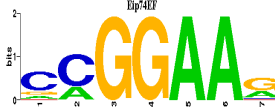   |
| Roaz        | 4.4644e-04     | ACCN <sup>Y</sup> CC <sup>K</sup> NN <sup>K</sup> KTNSCAAGCYGCGG<br>GNMMCCYTRGGK <sup>K</sup> SC----- |    |
| TEAD1       | 2.6430e-03     | CCGCRGCTTGSNAMM <sup>N</sup> NMGGRNGGT-<br>-----CNSW <sup>G</sup> GGAATGTR                            |    |
| SPIB        | 1.2179e-02     | ACCN <sup>Y</sup> CC <sup>K</sup> NN <sup>K</sup> KTNSCAAGCYGCGG<br>---TT <sup>C</sup> CKST-----      |    |
| NHLH1       | 1.5149e-02     | CCGCRGCTTGSNAMM <sup>N</sup> NMGGRNGGT<br>NCGCAGCTGCGN-----                                           |    |
| TFAP2A      | 1.6791e-02     | ACCN <sup>Y</sup> CC <sup>K</sup> NN <sup>K</sup> KTNSCAAGCYGCGG<br>----SCN <sup>N</sup> NNNGGC-----  |   |
| SPI1        | 1.7288e-02     | ACCN <sup>Y</sup> CC <sup>K</sup> NN <sup>K</sup> KTNSCAAGCYGCGG<br>--STTCN-----                      |  |
| ELK4        | 1.9825e-02     | ACCN <sup>Y</sup> CC <sup>K</sup> NN <sup>K</sup> KTNSCAAGCYGCGG<br>-ACTTCGGT-----                    |  |
| ELF5        | 3.1065e-02     | CCGCRGCTTGSNAMM <sup>N</sup> NMGGRNGGT<br>-----NMGGAARTN                                              |  |
| PBF         | 3.9398e-02     | CCGCRGCTTGSNAMM <sup>N</sup> NMGGRNGGT<br>----R <sup>C</sup> TTT-----                                 |  |

**Motif\_7**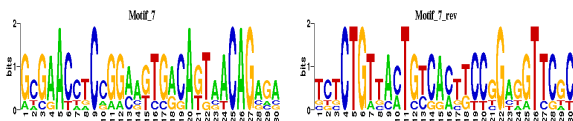

*forward*                      *reverse compliment*

| <i>Name</i> | <i>E value</i> | <i>Alignment</i>                                             | <i>Motif</i>                                                                          |
|-------------|----------------|--------------------------------------------------------------|---------------------------------------------------------------------------------------|
| ELK4        | 2.2790e-06     | TCTCTGTTACTGTCACTTCCGGAGGTTTCGC<br>-----ACTTCCGGT-----       |    |
| Eip74EF     | 3.0442e-06     | TCTCTGTTACTGTCACTTCCGGAGGTTTCGC<br>-----YTTCGG-----          |    |
| GABPA       | 4.9519e-06     | GCGAACCTCCGGAAGTGACAGTAACAGAGA<br>-----ACCGAAGNS-----        |    |
| ovo         | 1.1286e-05     | TCTCTGTTACTGTCACTTCCGGAGGTTTCGC<br>--NCNGTTACW-----          |    |
| Spz1        | 2.2719e-04     | TCTCTGTTACTGTCACTTCCGGAGGTTTCGC<br>--GCTGWTACCCT-----        |    |
| IRF2        | 4.8531e-04     | TCTCTGTTACTGTCACTTCCGGAGGTTTCGC<br>---NNWNRSTTTTCRITTCs----- |   |
| MIZF        | 9.0722e-03     | TCTCTGTTACTGTCACTTCCGGAGGTTTCGC<br>-----GCGGACGTTN--         |  |
| ELK1        | 9.6048e-03     | TCTCTGTTACTGTCACTTCCGGAGGTTTCGC<br>-----YTTCGGNNN-----       |  |
| SPI1        | 1.8421e-02     | TCTCTGTTACTGTCACTTCCGGAGGTTTCGC<br>-----STTCN-----           |  |
| IRF1        | 1.8953e-02     | TCTCTGTTACTGTCACTTCCGGAGGTTTCGC<br>-----GGTTTCRNITTN-----    |  |

Sequence logo generation powered by [weblogo](#)  
 STAMP is written by Shaun Mahony
